# Supplementary material for: A multivariate statistical framework for mixed storm types in compound flood analysis
Source: Copernicus journal article supplement (doi:10.5194/nhess-24-4091-2024), 2024-11-27
Supplement: Supplementary file 1 [file nhess-24-4091-2024-supplement.pdf]

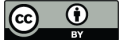

*Supplement of*

## **A multivariate statistical framework for mixed storm types in compound flood analysis**

**Pravin Maduwantha et al.**

*Correspondence to:* Pravin Maduwantha (pravin@ucf.edu)

The copyright of individual parts of the supplement might differ from the article licence.

Supplementary

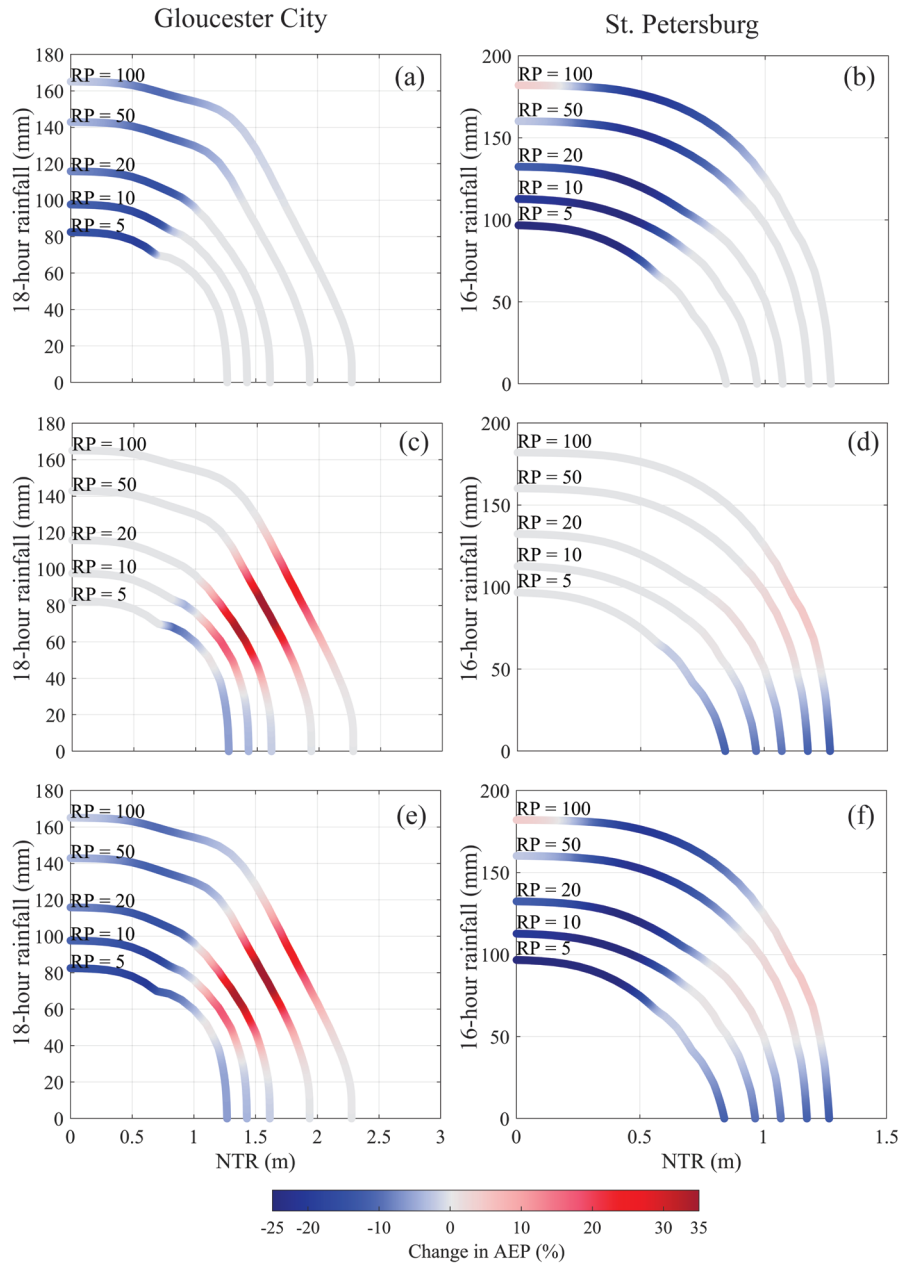

Figure S1: Change in AEP of combined populations in Gloucester City (left) and St. Petersburg (right), allowing the selected copulas to be changed. (a), (b) when omitting the non-classified POT RF events; (c), (d) when omitting the non-classified POT NTR events; and (e), (f) when omitting all non-classified events. The change in AEP was calculated along the joint probability isolines derived for the analysis where events are stratified as TC and non-TC.

**Table S1: Number of events and the selected copula families for each conditional sample**

|                         | Gloucester City                      |                                      |           |         | St. Petersburg |         |              |                  |
|-------------------------|--------------------------------------|--------------------------------------|-----------|---------|----------------|---------|--------------|------------------|
|                         | TC                                   |                                      | non-TC    |         | TC             |         | non-TC       |                  |
|                         | con. NTR                             | con. RF                              | con. NRT  | con. RF | con. NTR       | con. RF | con. NRT     | Con. RF          |
| Number of events        | 38                                   | 43                                   | 542       | 537     | 37             | 47      | 318          | 308              |
| Selected copulas family | Rot. Tawn type 2 (180 <sup>0</sup> ) | Rot. Tawn type 2 (180 <sup>0</sup> ) | Frank-Joe | Clayton | Frank          | Frank   | Survival BB7 | Survival Clayton |

10 **Table S2: Selected copula families for each conditional sample for the analysis from 1950 to 2021**

|                                        | Gloucester City  |                  |          |          | St. Petersburg |         |          |              |
|----------------------------------------|------------------|------------------|----------|----------|----------------|---------|----------|--------------|
|                                        | TC               |                  | non-TC   |          | TC             |         | non-TC   |              |
|                                        | con. NTR         | con. RF          | con. NRT | con. RF  | con. NTR       | con. RF | con. NRT | Con. RF      |
| Stratifying as TC & non-TC             | Rot. Tawn type 2 | Rot. Tawn type 2 | BB8      | Gaussian | Frank          | Frank   | Sur. BB7 | Sur. Clayton |
| Removing non-classified POT NTR events |                  |                  | Gumbel   | Gaussian |                |         | Gaussian | Sur. Clayton |
| Removing non-classified POT RF events  |                  |                  | BB8      | Clayton  |                |         | Sur. BB7 | Gaussian     |
